# Supplementary material for: Parallel Molecular Evolution of Catalases and Superoxide Dismutases—Focus on Thermophilic Fungal Genomes
Source: MDPI journal article supplement (doi:10.3390/antiox9111047), 2020-10-27

## Report

|                                 | contigs  |
|---------------------------------|----------|
| # contigs ( $\geq 0$ bp)        | 15210    |
| # contigs ( $\geq 1000$ bp)     | 4552     |
| # contigs ( $\geq 5000$ bp)     | 1932     |
| # contigs ( $\geq 10000$ bp)    | 765      |
| # contigs ( $\geq 25000$ bp)    | 67       |
| # contigs ( $\geq 50000$ bp)    | 2        |
| Total length ( $\geq 0$ bp)     | 29434923 |
| Total length ( $\geq 1000$ bp)  | 27455616 |
| Total length ( $\geq 5000$ bp)  | 20583149 |
| Total length ( $\geq 10000$ bp) | 12345051 |
| Total length ( $\geq 25000$ bp) | 2142392  |
| Total length ( $\geq 50000$ bp) | 106138   |
| # contigs                       | 5452     |
| Largest contig                  | 54257    |
| Total length                    | 28100611 |
| GC (%)                          | 53.47    |
| N50                             | 8792     |
| N75                             | 4715     |
| L50                             | 948      |
| L75                             | 2034     |
| # N's per 100 kbp               | 0.00     |

All statistics are based on contigs of size  $\geq 500$  bp, unless otherwise noted (e.g., "# contigs ( $\geq 0$  bp)" and "Total length ( $\geq 0$  bp)" include all contigs).

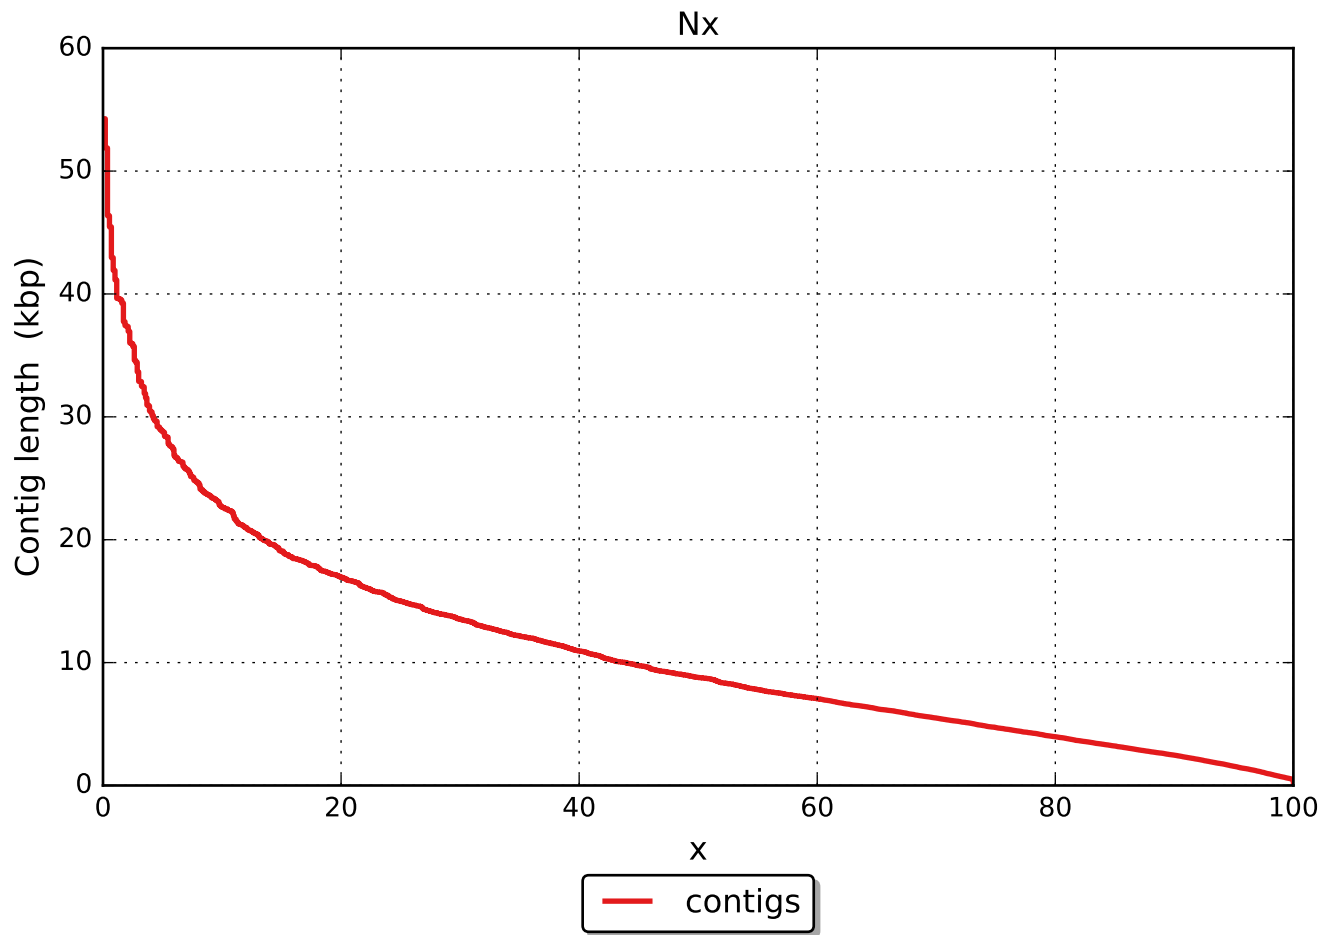

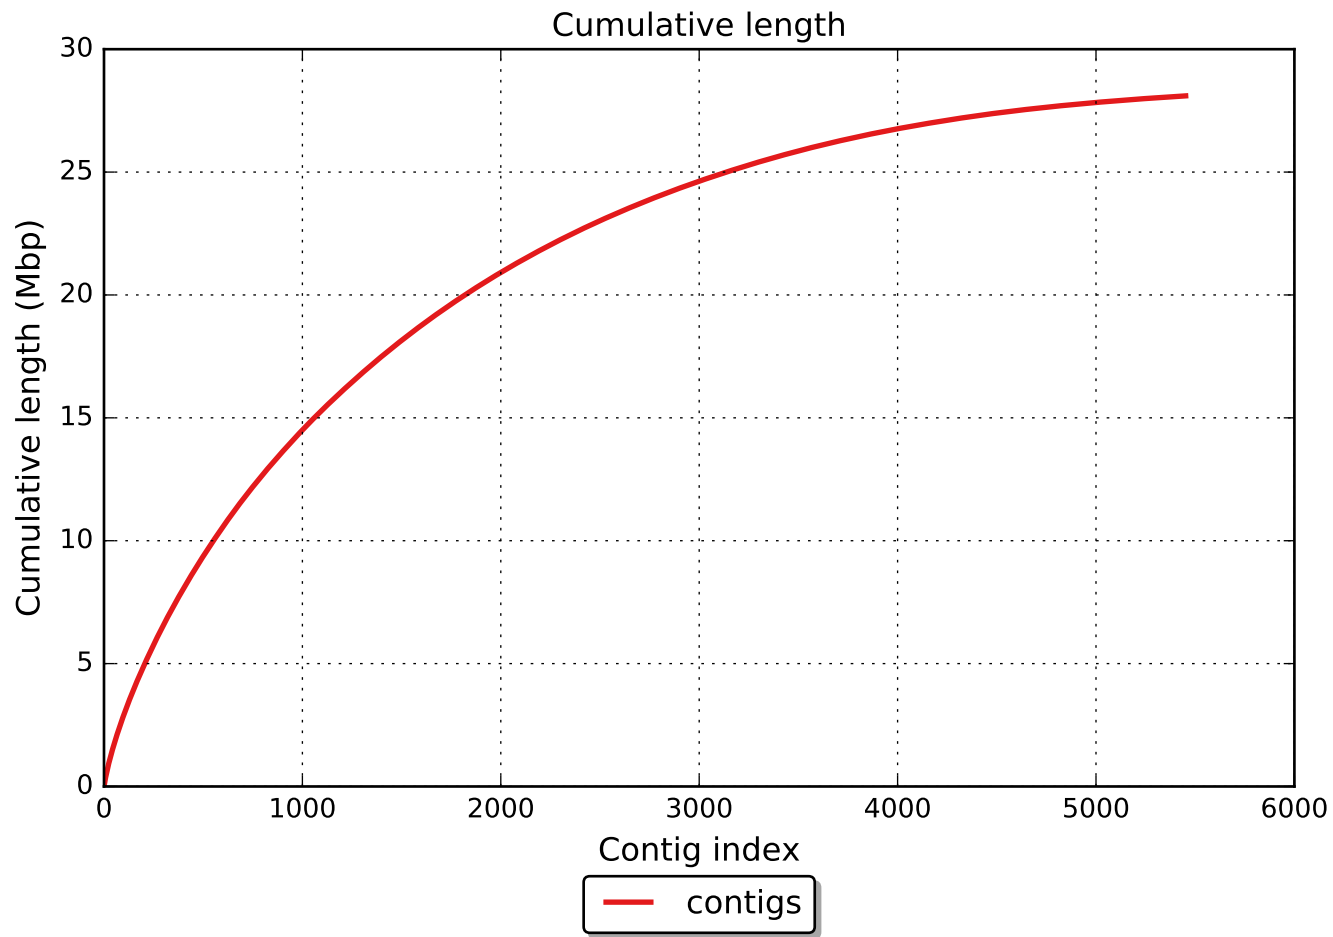

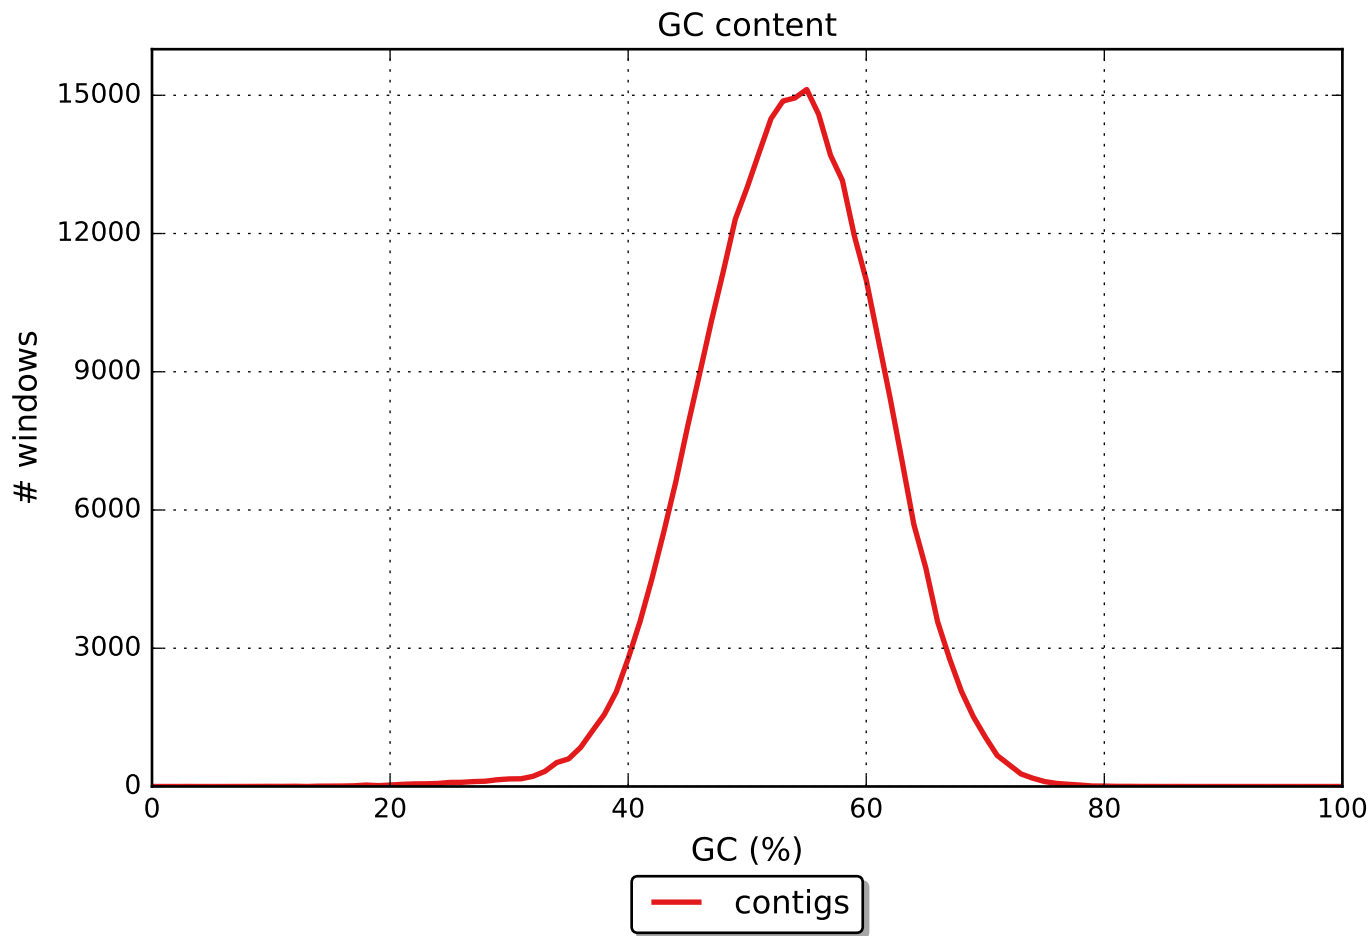

Coverage histogram (bin size: 1x)

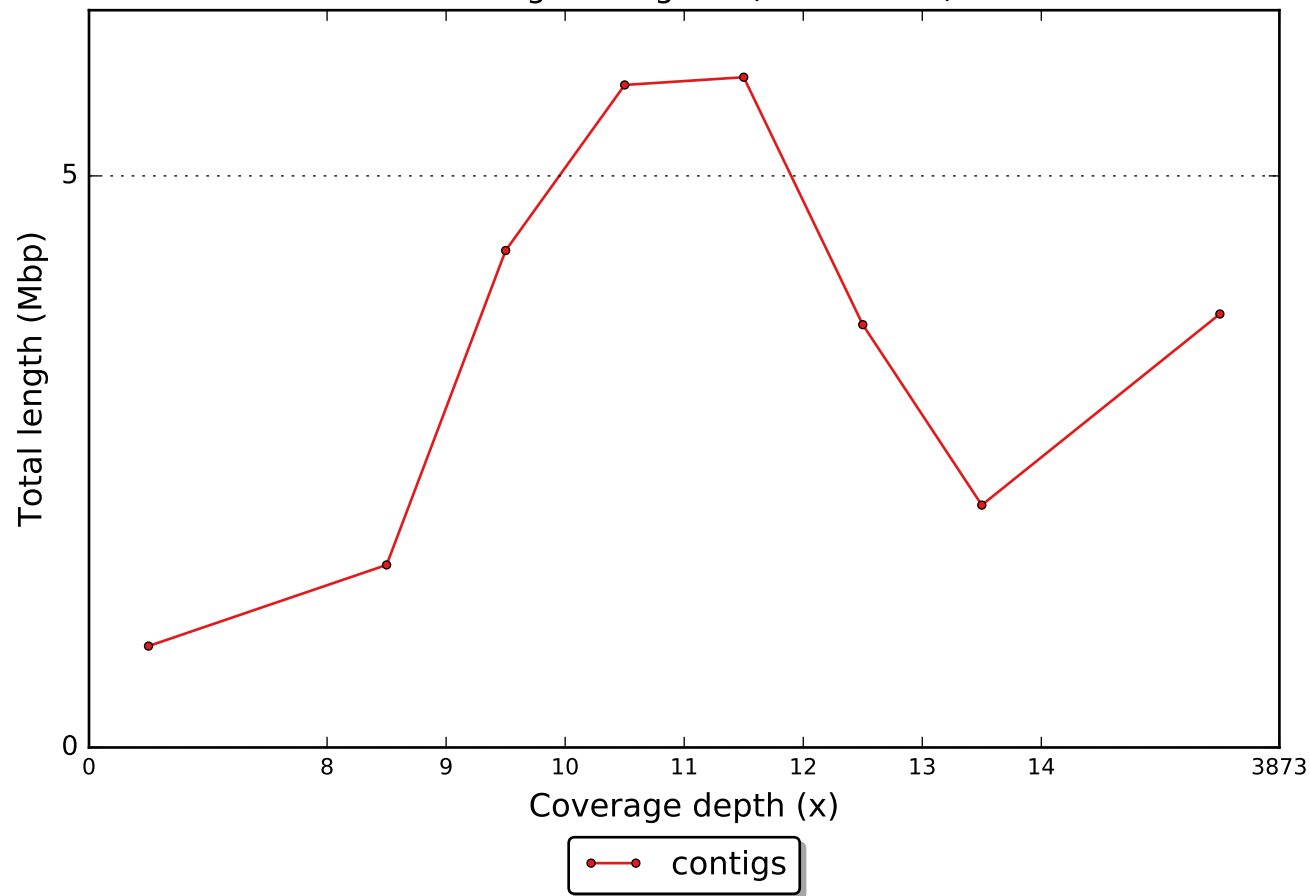

contigs coverage histogram (bin size: 1x)

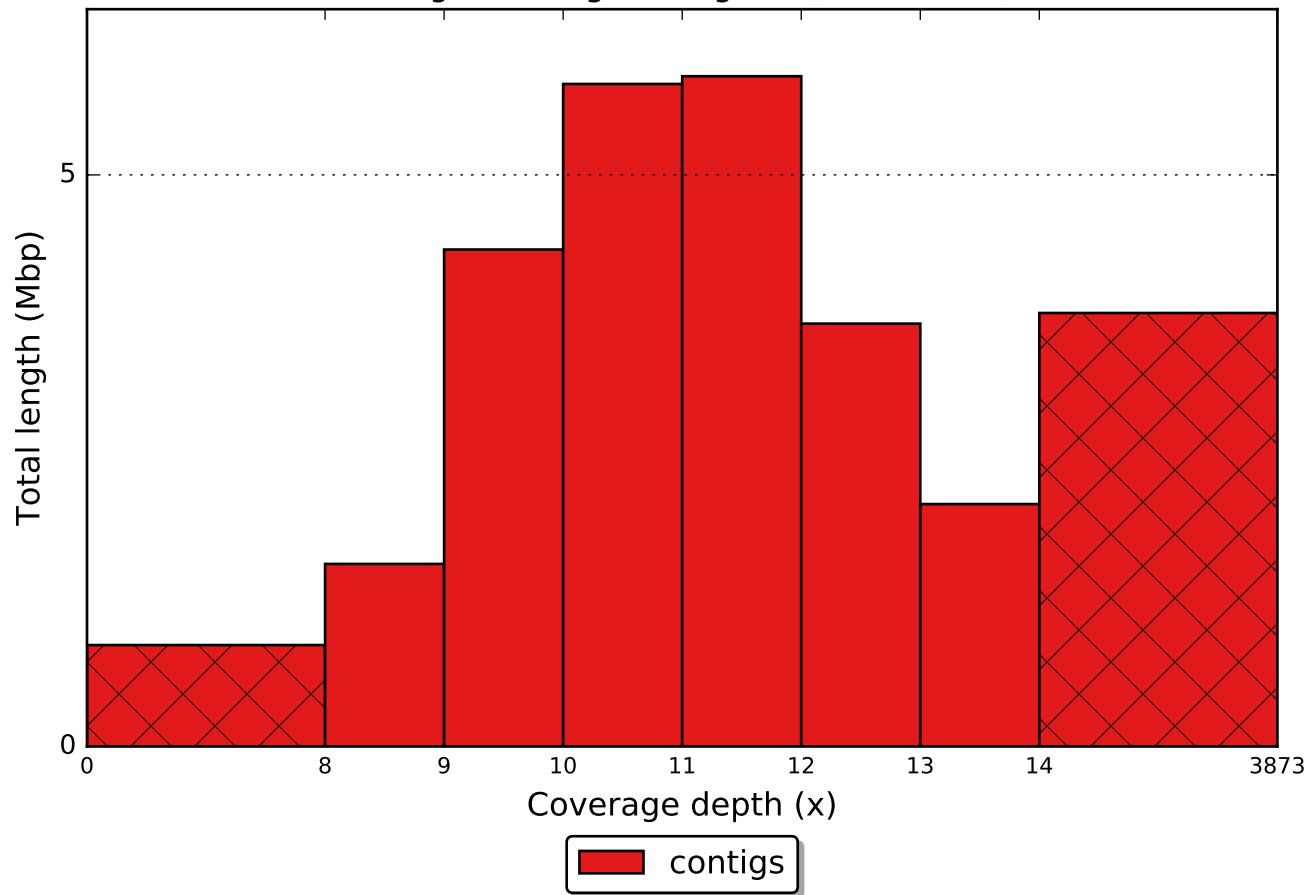

Supplement: s1 [file s1]
