# Supplementary material for: Parallel Molecular Evolution of Catalases and Superoxide Dismutases—Focus on Thermophilic Fungal Genomes
Source: MDPI journal article supplement (doi:10.3390/antiox9111047), 2020-10-27
Supplement: s1 [file s1]

A)

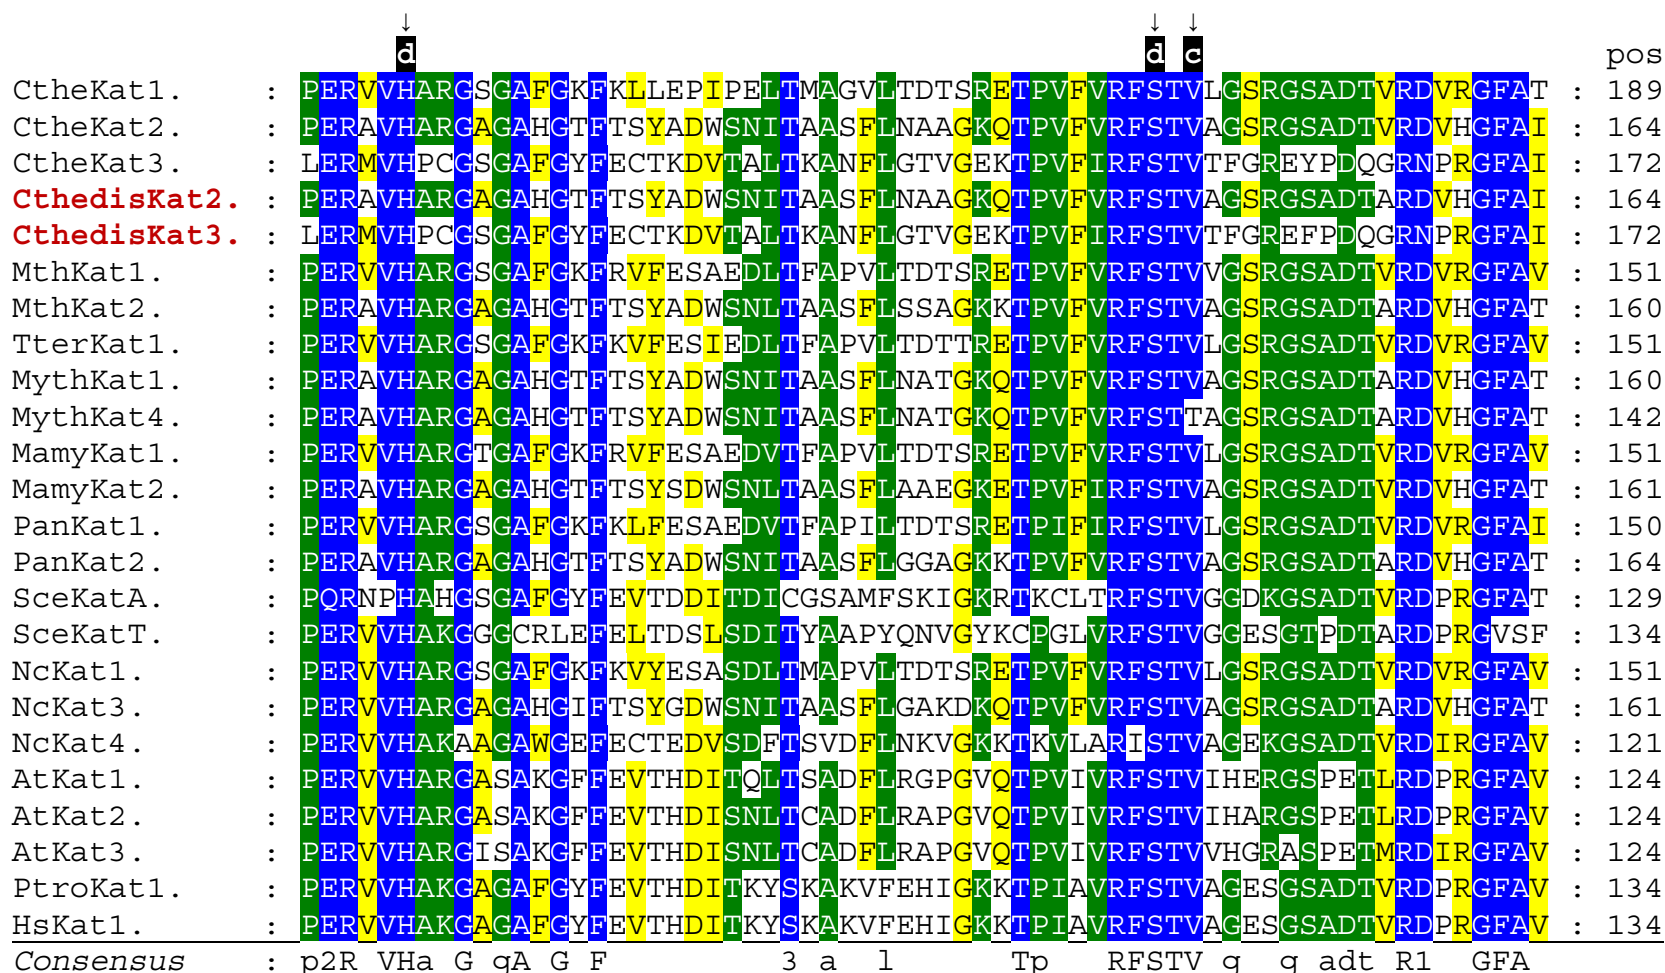

Suppl. Figure 4. Multiple sequence alignment showing conserved essential regions of typical heme catalases obtained with Muscle implemented in MEGA X package [14]. Presented highly conserved regions are A) distal side of heme & B) proximal side of heme. Color scheme: blue - highly conserved positions (above 95% of all aligned sequences), green - moderately conserved (between 75-95%), yellow - weakly conserved positions (between 50-75%). Numbers on the right represent corresponding amino acid position of each sequence.

A) (continued)

|              |   | <div>↓<br/>d</div> | <div>↓<br/>cc</div>                                    |                                                     | pos                                               |       |
|--------------|---|--------------------|--------------------------------------------------------|-----------------------------------------------------|---------------------------------------------------|-------|
| CtheKat1.    | : | KFYTK              | EGNWD                                                  | IVGNNI                                              | PVFFFIQDAIKFPDVIHAGKPEPHNEVPQAQSAHNFW---DFQFNHTE- | : 250 |
| CtheKat2.    | : | RFYTDEGNFD         | IVGNNI                                                 | PVFFFIQDAIRFPDLIHAVKPSPDSEIPQAATAHDSAW---DFFSSQPS-  | : 225                                             |       |
| CtheKat3.    | : | KFYTLEGNYDI        | -----                                                  | PIFFCRDPLOGPDVIRSQYRNPRNFLLDW---DACF---             | DLLANAPE-                                         | : 224 |
| CthedisKat2. | : | RFYTDEGNFD         | IVGNNI                                                 | PVFFFIQDAIRFPDLVHAVKPSPDSEIPQAATAHDSAW---DFFSSQPS-  | : 225                                             |       |
| CthedisKat3. | : | KFYTLEGNYDIVGL     | NFPIFFCRDPLOGPDVIRSQYRNPRNFLLDW---DACF---              | DLLANTPE-                                           | : 229                                             |       |
| MthKat1.     | : | KFYTDEGNWD         | IVGNNI                                                 | PVFFFIQDAIKFPDVIHAVKPEPHNEVPQAQTAHNFW---DFEFNHTE-   | : 212                                             |       |
| MthKat2.     | : | RFYTDEGNFD         | IVGNNI                                                 | PVFFFIQDAIQFPDLIHAVKPRPDNEIPQAATAHDSAW---DFFSSQPS-  | : 221                                             |       |
| TterKat1.    | : | KFYTQEGNWD         | IIGNDI                                                 | PVFFFIQDAIKFPDVIHAGKPEPHNEVPQAQSAHNFW---DFQFNHTE-   | : 212                                             |       |
| MythKat1.    | : | RFYTDEGNFD         | IVGNNI                                                 | PVFFFIQDAIQFPDLIHSV KPRPDNEIPQAATAHDSAW---DFFSQQPS- | : 221                                             |       |
| MythKat4.    | : | RFYTDEGNFD         | IVGNNI                                                 | PVFFFIQDAIQFPDLIHSV KPRPDNEIPQAATAHDSAW---DFFSQQPS- | : 203                                             |       |
| MamyKat1.    | : | KFYTQEGNWD         | IVGNNI                                                 | PVFFFIQDAIKFPDVIHAGKPEPHNEVPQAQSAHNFW---DFQYNHSE-   | : 212                                             |       |
| MamyKat2.    | : | RFYTDEGNFD         | IVGNNI                                                 | PVFFFIQDAIHFPDLIHAVKPRPDNEIPQAASAHD SAW---DFFSSQPS- | : 222                                             |       |
| PanKat1.     | : | KFYTQEGNWD         | IVANNI                                                 | PVFFFIQDAIKFPDVIHAGKPEPHNEVPQAQTAHNFW---DFQYNHTE-   | : 211                                             |       |
| PanKat2.     | : | RFYTDEGNFD         | IVGNNI                                                 | PVFFFIQDAIRFPDLIHSV KPSPDNEVPQAATAHDSAW---DFFSQQPS- | : 225                                             |       |
| SceKatA.     | : | KFYTEEGNLDWVYNN    | TPVFFFIRDPSKFPHFIHTQKRNPQTNLRDA---DMFW---              | DFLT-TPEN                                           | : 186                                             |       |
| SceKatT.     | : | KFYTEWGNHDWFVNN    | TPVFFFLRDAIKFPVFIHSQKRDPQSHLNQFQDT-TIYW---             | DYLTLNPE-                                           | : 194                                             |       |
| NcKat1.      | : | KFYTEEGNWD         | LVGNNI                                                 | PVFFFIQDAIKFPDVIHAGKPEPHNEVPQAQSAHNFW---DFQFNHTE-   | : 212                                             |       |
| NcKat3.      | : | RFYTDEGNFD         | IVGNNI                                                 | PVFFFIQDAIRFPDLIHSV KPSPDNEVPQAATAHDSAW---DFFSSQPS- | : 222                                             |       |
| NcKat4.      | : | KFFT EGNWDFVGNDL   | PVFFFIRD                                               | PVKFPSLNRSHKRHPQTNVPDS---TMFW---                    | DFHNNNQE-                                         | : 178 |
| AtKat1.      | : | KFYTREGNFD         | LVGNNF                                                 | PVFFFVRDGMKFDPDMVHALKPNPKSHIQE-----NWRILDFFSHHPE-   | : 181                                             |       |
| AtKat2.      | : | KFYTREGNFD         | LVGNNF                                                 | PVFFFIRDGMKFDPDIVHALKPNPKSHIQE-----NWRILDFFSHHPE-   | : 181                                             |       |
| AtKat3.      | : | KFYTREGNFD         | LVGNNTPVFFFIRDGIQFPDVVHALKPNRKTNIQE-----YWRILDYMSHLPE- | : 181                                               |                                                   |       |
| PtroKat1.    | : | KFYTEDGNWD         | LVGNNTP                                                | PIFFFIRDPILFPSFIHSQKRNPQTHLKDP---DMVW---            | DFWSLRPE-                                         | : 191 |
| HsKat1.      | : | KFYTEDGNWD         | LVGNNTP                                                | PIFFFIRDPILFPSFIHSQKRNPQTHLKDP---DMVW---            | DFWSLRPE-                                         | : 191 |
| Consensus    | : | 4F5T               | eGN D 6qn1                                             | P6FF D 6 fPd 6h k P 6 5 D                           |                                                   |       |

Suppl. Figure 4 continued.

B)

[illegible]

Suppl. Figure 4 continued.
