# Supplementary material for: Parallel Molecular Evolution of Catalases and Superoxide Dismutases—Focus on Thermophilic Fungal Genomes
Source: MDPI journal article supplement (doi:10.3390/antiox9111047), 2020-10-27
Supplement: s1 [file s1]

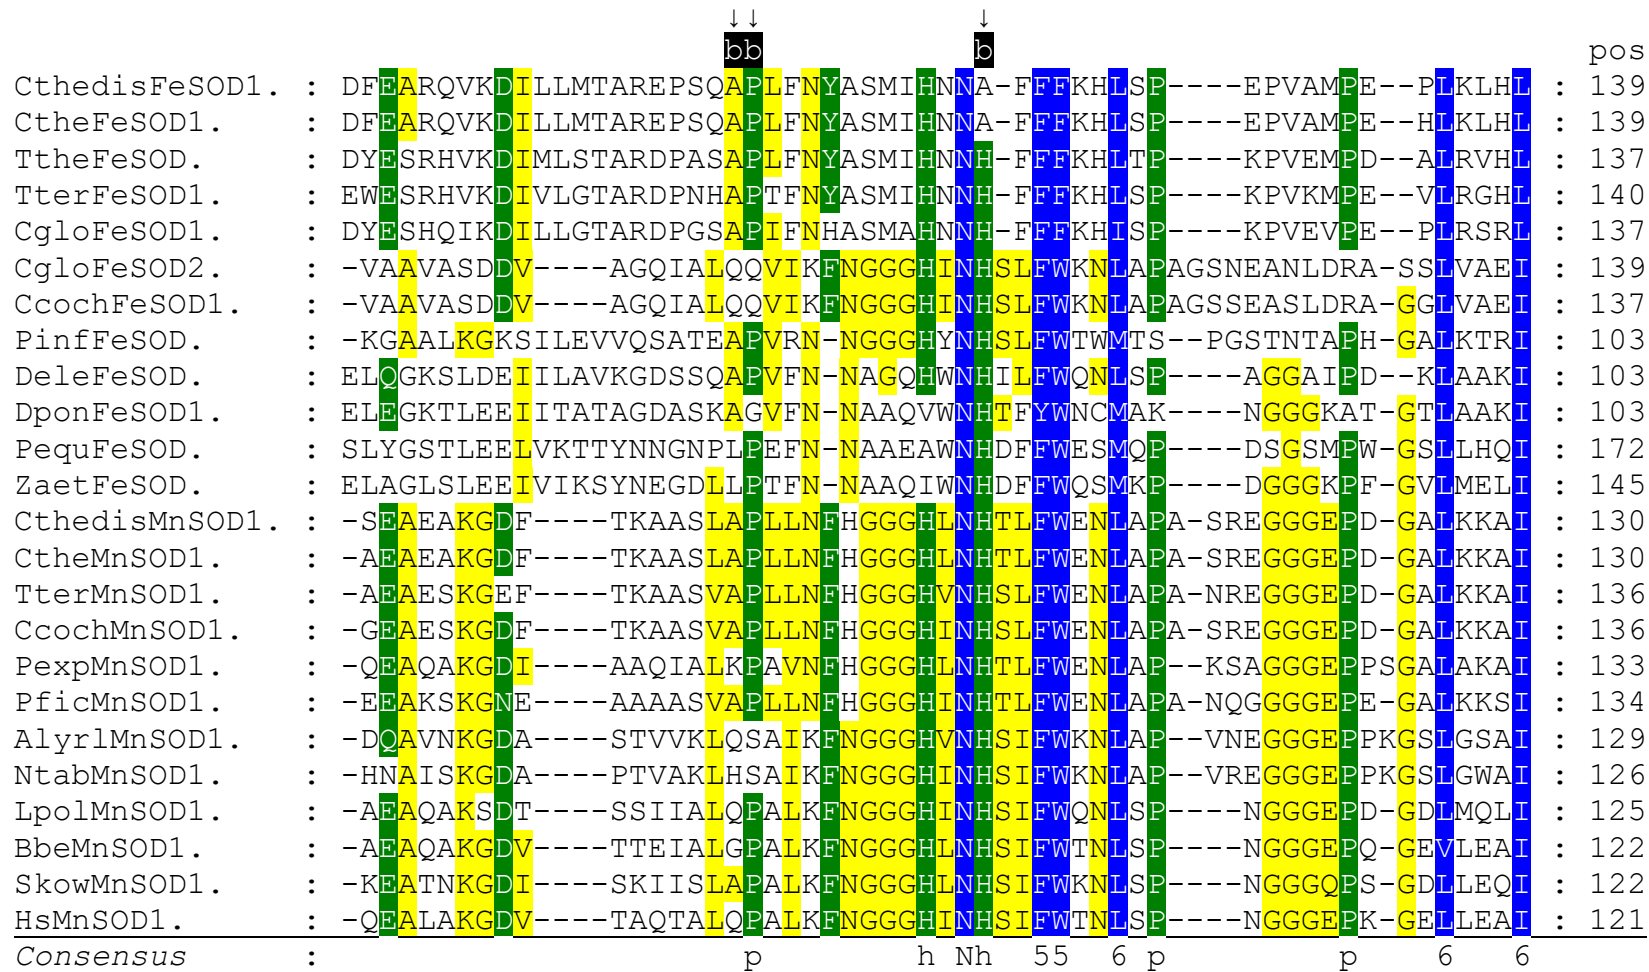

Suppl. Figure 3. Multiple sequence alignment showing essential regions of FeMnSOD obtained with Muscle implemented in MEGA X package [14]. Highly conserved regions responsible for metal binding are shown above the alignment. Color scheme: blue - highly conserved positions (above 95% of all aligned sequences), green - moderately conserved (between 75-95%), yellow - weakly conserved positions (between 50-75%). Numbers on the right represent corresponding amino acid position of each sequence.

[illegible]
