# Supplementary material for: Parallel Molecular Evolution of Catalases and Superoxide Dismutases—Focus on Thermophilic Fungal Genomes
Source: MDPI journal article supplement (doi:10.3390/antiox9111047), 2020-10-27
Supplement: s1 [file s1]

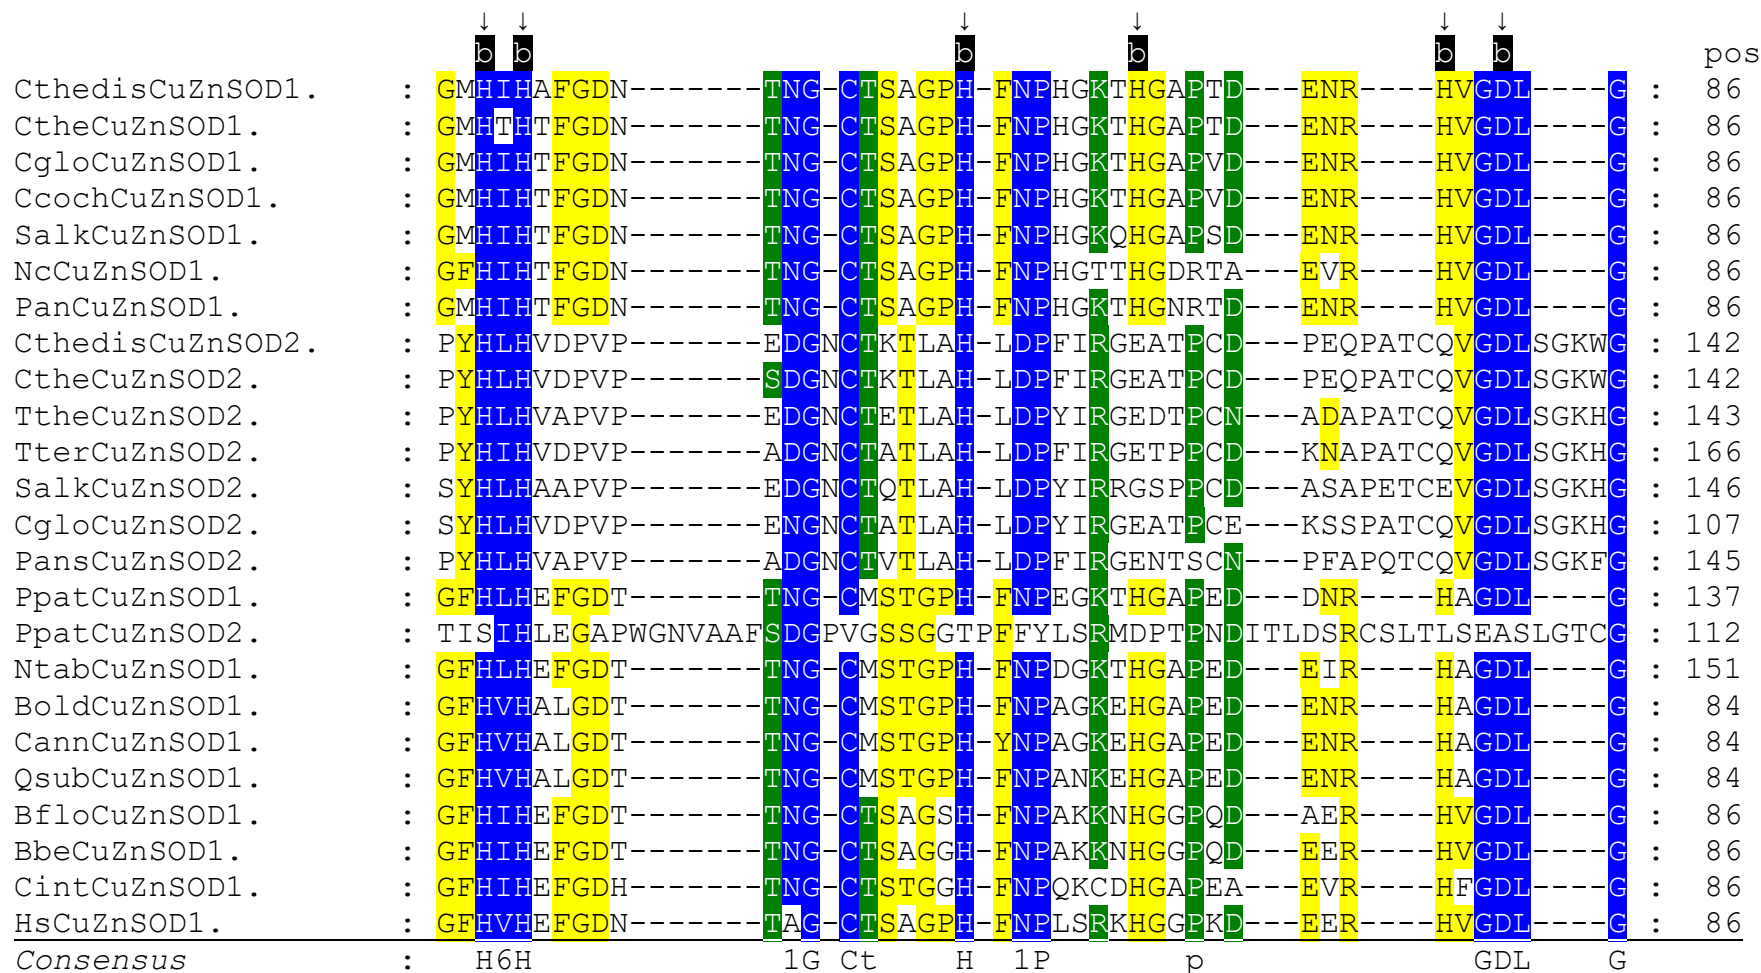

Suppl. Figure 2. Multiple sequence alignment showing essential regions of CuZnSOD obtained with Muscle implemented in MEGA X package [14]. Highly conserved regions responsible for metal binding are shown above the alignment. Color scheme: blue - highly conserved positions (above 95% of all aligned sequences), green - moderately conserved (between 75-95%), yellow - weakly conserved positions (between 50-75%). Numbers on the right represent corresponding amino acid position of each sequence.

|                   | ↓<br>b |                                                                                                                               | pos |
|-------------------|--------|-------------------------------------------------------------------------------------------------------------------------------|-----|
| CthediscCuZnSOD1. | :      | N I E T D A N G N S K G T M T D H L V K - L I G P E S V I G - R T V V V H A G T ----- D ----- :                               | 125 |
| CtheCuZnSOD1.     | :      | N I E T D A N G N S K G T M T D H L V K - L I G P E S V I G - R T V V V H A G T ----- D ----- :                               | 125 |
| CgloCuZnSOD1.     | :      | N I E T D A Q G N S K G T V T D K H I K - I I G P E S V I G - R T V V V H A G T ----- D ----- :                               | 125 |
| CcochCuZnSOD1.    | :      | N I E T D A Q G N S K G S V T D K H I K - I I G P E S V I G - R T V V V H A G T ----- D ----- :                               | 125 |
| SalkCuZnSOD1.     | :      | N I E T D A Q G N S K G E V T D S L I K - L I G P E S V I G - R T V V V H A G T ----- D ----- :                               | 125 |
| NcCuZnSOD1.       | :      | N I E T D A Q G N A K G T V T D N L V K - L I G P E S V I G - R T V V V H A G T ----- D ----- :                               | 125 |
| PanCuZnSOD1.      | :      | N I E T D A Q G N S K G T V T D N L I K - L I G P E S V I G - R T V V V H A G T ----- D ----- :                               | 125 |
| CthediscCuZnSOD2. | :      | D I I P D E N G T F E Q T Y T D L Y A S T K E G I G A F F G N R S V V V H F P N ----- K T R I T C A S F :                     | 191 |
| CtheCuZnSOD2.     | :      | D I I P D E N G T F E Q T Y T D L Y A S T K E G I G A F F G N R S I V V H F P N ----- K - T R I T C A N :                     | 190 |
| TtheCuZnSOD2.     | :      | K I P A N K T - T F E T S Y V D L Y A S T V E G I G A F F G N R S I V F H F P N ----- K - T R I T C A N :                     | 190 |
| TterCuZnSOD2.     | :      | A I P T D Q D - T W E T S Y V D L Y A S T L E G I G A F F G N R S I V V H Y P N ----- K - T R I T C A S :                     | 213 |
| SalkCuZnSOD2.     | :      | L I D P - A G G A F E A V Y V D E F A S L I E G Q G A F F G N R S F V L H L A S ----- D ----- :                               | 186 |
| CgloCuZnSOD2.     | :      | A I T P D A E G A F E A T Y V D L Y A S T L E G I G A F F G N R S I V F H H P N ----- K - T R I S C A S :                     | 155 |
| PansCuZnSOD2.     | :      | E I R P E E D G T W E T T Y T D L Y S S T L E G L G S F F G N R S I V F H Y P N ----- K - T R I S C A N :                     | 193 |
| PpatCuZnSOD1.     | :      | N V I A G N D G V V E V T L E D S Q I P - L S G P H S V V G - R A F V I H E A E ----- D ----- :                               | 176 |
| PpatCuZnSOD2.     | :      | S V D P E N P T C A R L T L S G K M M E I T D Q Q E L D F A A L A L F S K H P E M P D W P K W H K W I F Y K L D I L N I Y L : | 174 |
| NtabCuZnSOD1.     | :      | N I V A N A N G V A E A T F V D N Q I P - L T G P N S V V G - R A L V V H E L E ----- D ----- :                               | 190 |
| BoldCuZnSOD1.     | :      | N V T A G A D G V A N V N V D S Q I P - L T G P Q S I I G - R A V V V H A D P ----- D ----- :                                 | 123 |
| CannCuZnSOD1.     | :      | N I T V G E D G T A S F T I T D E Q I P - L T G P Q S I I G - R A V V V H A D P ----- D ----- :                               | 123 |
| QsubCuZnSOD1.     | :      | N V N V G A D G T V N F T I T D K Q I P - L S G P N S I I G - R A V V V H A D P ----- D ----- :                               | 123 |
| BfloCuZnSOD1.     | :      | N V E V G D D G V A T I N I T D S Q L Q - L T G P N S I V G - R A V V V H A G E ----- D ----- :                               | 125 |
| BbeCuZnSOD1.      | :      | N V E V G E D G E A N I K I T D S Q L Q - L T G P N S I I G - R A V V V H A G E ----- D ----- :                               | 125 |
| CintCuZnSOD1.     | :      | N V T A D S S G V A E V N I S D K Y V T - L T G I N S V I G - R A V V V H A D V ----- D ----- :                               | 125 |
| HsCuZnSOD1.       | :      | N V T A D K D G V A D V S I E D S V I S - L S G D H C I I G - R T L V V H E K A ----- D ----- :                               | 125 |
| <i>Consensus</i>  | :      | 6 g D G G R V H                                                                                                               |     |

Suppl. Figure 2 continued.
